# Supplementary material for: ZBED6 Modulates the Transcription of Myogenic Genes in Mouse Myoblast Cells
Source: PubMed Central journal article supplement (PMC3979763; doi:10.1371/journal.pone.0094187), 2014-04-08
Supplement: pone.0094187.s002.pdf [file pone.0094187.s002.pdf]

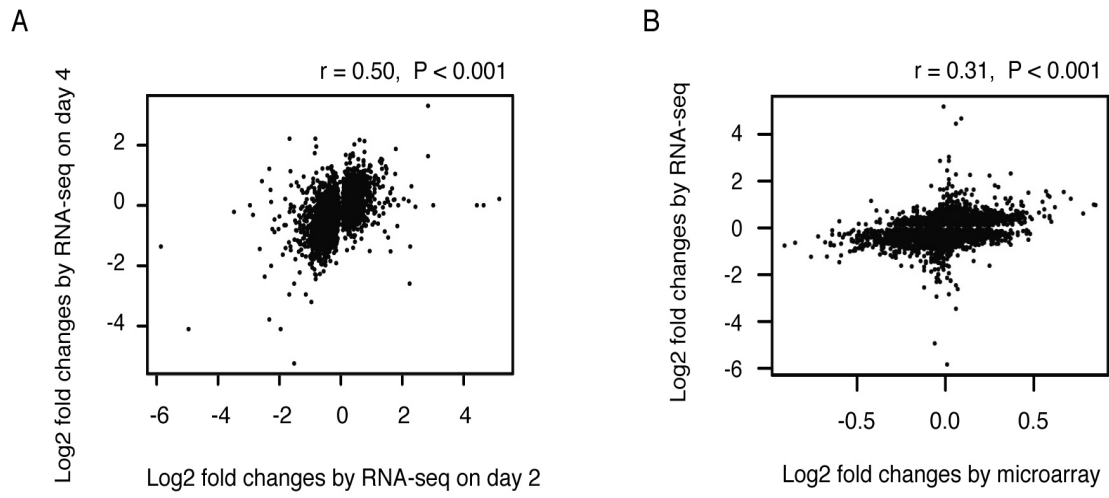

**Figure S2.** Analysis of RNA-seq data. A. The correlation between the Log<sub>2</sub> RNA-seq fold changes computed on the data from day 4 (y-axis) versus that from day 2 (x-axis); B. The correlation between the Log<sub>2</sub> fold changes measured by RNA-seq and microarrays for all genes.
