# Supplementary material for: ZBED6 Modulates the Transcription of Myogenic Genes in Mouse Myoblast Cells
Source: PubMed Central journal article supplement (PMC3979763; doi:10.1371/journal.pone.0094187), 2014-04-08
Supplement: pone.0094187.s005.pdf [file pone.0094187.s005.pdf]

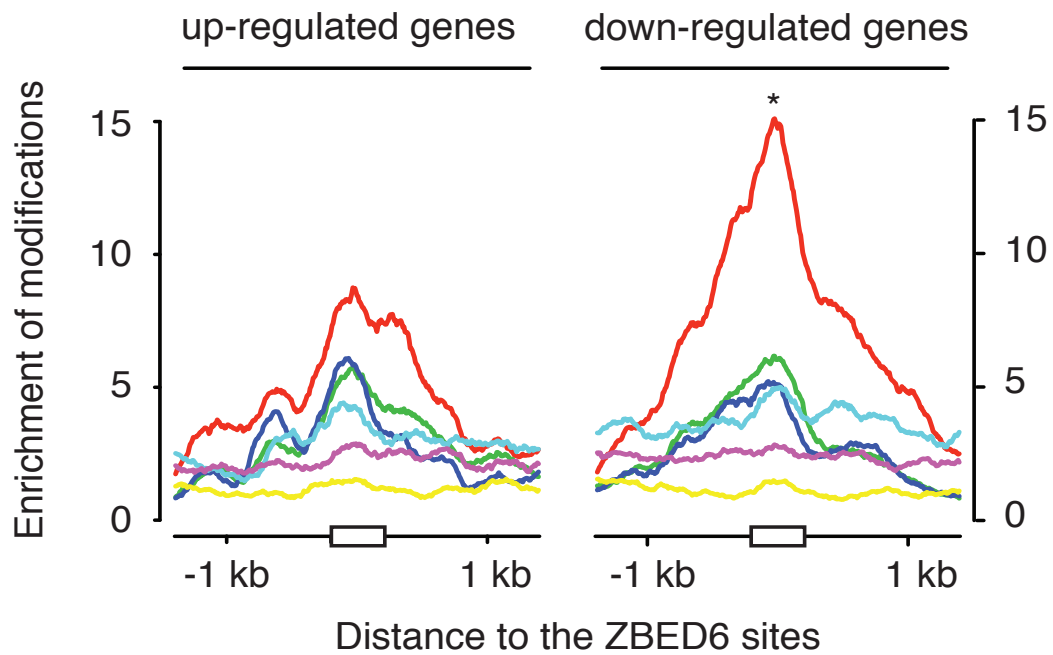

**Figure S5.** Enrichment analysis of six histone modifications across ZBED6 target sites. ZBED6 target genes were divided into up-regulated and down-regulated genes after Zbed6 silencing. The asterisk indicates a significant difference ( $P < 0.05$ ). H3K4me2 (dark red), H3K4me3 (green), H3K27ac (purple), H3K4me1 (blue), H3K27me3 (pink), and H3K36me3 (yellow).
