# Supplementary material for: ZBED6 Modulates the Transcription of Myogenic Genes in Mouse Myoblast Cells
Source: PubMed Central journal article supplement (PMC3979763; doi:10.1371/journal.pone.0094187), 2014-04-08
Supplement: pone.0094187.s006.pdf [file pone.0094187.s006.pdf]

**Table S1.** Summary of RNA sequencing and reads mapping.

| Pooled samples:       | Day 2<br>Control | Day 2<br><i>Zbed6</i> -<br>silenced | Day 4<br>Control | Day 4<br><i>Zbed6</i> -<br>silenced |
|-----------------------|------------------|-------------------------------------|------------------|-------------------------------------|
| Total reads (million) | 49               | 51                                  | 53               | 42                                  |
| Aligned reads (%)     | 51.7%            | 55.9%                               | 57.8%            | 63.5%                               |
| Uniquely aligned (%)  | 43.2%            | 47.8%                               | 48.1%            | 53.5%                               |
