# Supplementary material for: ZBED6 Modulates the Transcription of Myogenic Genes in Mouse Myoblast Cells
Source: PubMed Central journal article supplement (PMC3979763; doi:10.1371/journal.pone.0094187), 2014-04-08
Supplement: pone.0094187.s007.pdf [file pone.0094187.s007.pdf]

**Table S2.** Differentially expressed genes identified by RNA-seq. M-value is equal to log2 fold changes. N.A stands for not available.

| Official gene symbol | Expression level (RPKM) | RNAseq Day2 M-value | RNAseq Day2 FDR | RNAseq Day4 M-value | RNAseq Day4 FDR | Array Day2 M-value | Array Day2 FDR |
|----------------------|-------------------------|---------------------|-----------------|---------------------|-----------------|--------------------|----------------|
| <i>Ttn</i>           | 7                       | 1.0                 | 0.0E+00         | 0.6                 | 2.5E-141        | 0.0                | 0.94           |
| <i>Tpcn1</i>         | 60                      | -1.3                | 0.0E+00         | -0.7                | 7.7E-85         | -0.6               | 0.0000         |
| <i>Tmbim6</i>        | 180                     | -0.6                | 0.0E+00         | -1.0                | 0.0E+00         | -0.7               | 0.0000         |
| <i>Thbs1</i>         | 169                     | 0.9                 | 0.0E+00         | 0.2                 | 2.4E-129        | -0.4               | 0.0000         |
| <i>Sh3glb1</i>       | 191                     | 0.9                 | 0.0E+00         | 0.2                 | 3.5E-114        | 0.4                | 0.0004         |
| <i>Sdpr</i>          | 84                      | 1.5                 | 0.0E+00         | 1.3                 | 0.0E+00         | 0.6                | 0.0000         |
| <i>Scd1</i>          | 596                     | 1.0                 | 0.0E+00         | 0.2                 | 0.0E+00         | -0.2               | 0.22           |
| <i>Npnt</i>          | 97                      | 1.7                 | 0.0E+00         | 1.0                 | 0.0E+00         | 0.1                | 0.08           |
| <i>Mylpf</i>         | 440                     | 1.0                 | 0.0E+00         | 0.9                 | 1.9E-247        | -0.2               | 0.40           |
| <i>Myh3</i>          | 96                      | 1.0                 | 0.0E+00         | 0.8                 | 3.5E-258        | N.A.               | N.A.           |
| <i>Ly6a</i>          | 664                     | 1.5                 | 0.0E+00         | 0.5                 | 3.9E-207        | 0.0                | 0.95           |
| <i>Lpp</i>           | 33                      | 1.1                 | 0.0E+00         | 0.2                 | 1.6E-80         | N.A.               | N.A.           |
| <i>Itgb1</i>         | 659                     | 0.8                 | 0.0E+00         | 1.3                 | 0.0E+00         | 0.0                | 0.70           |
| <i>H19</i>           | 1349                    | 0.8                 | 0.0E+00         | 1.0                 | 0.0E+00         | 0.3                | 0.07           |
| <i>Gsta4</i>         | 448                     | -0.8                | 0.0E+00         | -0.5                | 2.0E-45         | -0.2               | 0.05           |
| <i>Gm11410</i>       | 1678                    | 0.7                 | 0.0E+00         | 0.6                 | 0.0E+00         | N.A.               | N.A.           |
| <i>Col18a1</i>       | 66                      | -0.6                | 0.0E+00         | -0.5                | 2.8E-25         | -0.9               | 0.0000         |
| <i>Cfl1</i>          | 629                     | -0.8                | 0.0E+00         | -0.6                | 1.2E-115        | N.A.               | N.A.           |
| <i>AY036118</i>      | 407                     | -1.4                | 0.0E+00         | -1.6                | 5.0E-184        | N.A.               | N.A.           |
| <i>Actc1</i>         | 201                     | 1.4                 | 0.0E+00         | 0.6                 | 2.4E-55         | 0.3                | 0.019          |
| <i>Acta2</i>         | 623                     | 0.8                 | 0.0E+00         | 0.9                 | 0.0E+00         | -0.1               | 0.62           |
| <i>Krt80</i>         | 63                      | 1.4                 | 4.0E-304        | 0.5                 | 9.1E-119        | 0.0                | 0.99           |
| <i>Baspl</i>         | 168                     | -0.9                | 2.5E-285        | -0.3                | 1.2E-05         | 0.0                | 0.65           |
| <i>Gm10222</i>       | 2085                    | 0.9                 | 3.1E-267        | 1.7                 | 0.0E+00         | N.A.               | N.A.           |
| <i>Vcl</i>           | 245                     | 0.6                 | 4.6E-258        | 0.1                 | 4.9E-69         | -0.2               | 0.13           |
| <i>Gm13339</i>       | 1315                    | 0.9                 | 2.7E-254        | 1.2                 | 0.0E+00         | N.A.               | N.A.           |
| <i>Hkl1</i>          | 39                      | -0.7                | 1.9E-243        | -1.0                | 1.1E-174        | N.A.               | N.A.           |
| <i>Mfap3l</i>        | 115                     | 0.9                 | 1.0E-227        | 1.2                 | 0.0E+00         | 0.0                | 0.96           |
| <i>Fndc3a</i>        | 30                      | 1.1                 | 2.4E-216        | 0.0                 | 8.3E-14         | N.A.               | N.A.           |
| <i>Pkia</i>          | 51                      | 1.4                 | 2.2E-213        | 0.7                 | 1.2E-118        | 0.7                | 0.0000         |
| <i>Sfrp2</i>         | 40                      | -1.1                | 1.0E-208        | -1.3                | 1.8E-15         | -0.6               | 0.0000         |
| <i>Ppic</i>          | 120                     | -1.1                | 3.9E-206        | -1.9                | 0.0E+00         | -0.8               | 0.0000         |
| <i>Sema3d</i>        | 32                      | 1.1                 | 3.1E-199        | 0.6                 | 8.0E-76         | N.A.               | N.A.           |
| <i>Igf2</i>          | 28                      | 1.7                 | 6.5E-198        | 1.9                 | 0.0E+00         | 0.3                | 0.04           |
| <i>Qk</i>            | 93                      | 0.7                 | 5.4E-194        | 0.5                 | 0.0E+00         | N.A.               | N.A.           |
| <i>Mir5115</i>       | 1017                    | -1.6                | 8.0E-193        | -3.6                | 0.0E+00         | N.A.               | N.A.           |
| <i>Cald1</i>         | 158                     | 0.7                 | 1.3E-185        | 0.1                 | 4.6E-81         | 0.0                | 0.58           |
| <i>Rod1</i>          | 44                      | 1.2                 | 6.5E-180        | 0.3                 | 3.6E-95         | N.A.               | N.A.           |
| <i>Ap3m1</i>         | 96                      | 0.7                 | 2.7E-179        | 0.3                 | 3.3E-151        | 0.0                | 1.00           |
| <i>Ccdc141</i>       | 21                      | 1.0                 | 4.1E-176        | 0.4                 | 1.7E-58         | N.A.               | N.A.           |
| <i>Samd8</i>         | 30                      | 1.2                 | 8.4E-172        | 0.6                 | 9.6E-146        | 0.1                | 0.26           |
| <i>Mir5105</i>       | 798                     | -1.4                | 1.3E-171        | -1.6                | 9.5E-62         | N.A.               | N.A.           |
| <i>Atp13a3</i>       | 87                      | 0.8                 | 7.1E-162        | 0.5                 | 0.0E+00         | N.A.               | N.A.           |
| <i>Csnk1g2</i>       | 77                      | -0.7                | 3.3E-150        | -1.1                | 3.0E-135        | -0.3               | 0.06           |

There are more than 700 genes that did not show due to the limited space and the complete list is in the excel file.
