# Supplementary material for: ZBED6 Modulates the Transcription of Myogenic Genes in Mouse Myoblast Cells
Source: PubMed Central journal article supplement (PMC3979763; doi:10.1371/journal.pone.0094187), 2014-04-08
Supplement: pone.0094187.s008.pdf [file pone.0094187.s008.pdf]

**Table S3.** qPCR validation of 12 differentially expressed genes that were identified by RNA-seq.

| Gene           | Expression level (RPKM) | Expression categories | RNAseq Day2 M-value | RNAseq Day2 FDR | qPCR Day2 M-value | qPCR Day2 FDR |
|----------------|-------------------------|-----------------------|---------------------|-----------------|-------------------|---------------|
| <i>Fgf11</i>   | 5                       | low                   | 0.94                | 0.00            | 1.01              | 0.04          |
| <i>Nfkbil1</i> | 7                       | low                   | -0.75               | 0.00            | -1.73             | 0.01          |
| <i>Myo5a</i>   | 15                      | low                   | 0.82                | 0.00            | 1.18              | 0.02          |
| <i>Nr4a1</i>   | 31                      | medium                | -0.76               | 0.00            | -1.02             | 0.05          |
| <i>Sfrp2</i>   | 40                      | medium                | -1.20               | 0.00            | -1.24             | 0.01          |
| <i>Ddit4</i>   | 52                      | medium                | -0.86               | 0.00            | -0.61             | 0.32          |
| <i>Snord95</i> | 189                     | high                  | 0.67                | 0.00            | -0.28             | 0.56          |
| <i>Snord57</i> | 282                     | high                  | 1.11                | 0.00            | 0.64              | 0.03          |
| <i>Snord12</i> | 371                     | high                  | 1.00                | 0.00            | -0.1              | 0.74          |
| <i>H19</i>     | 1349                    | high                  | 0.81                | 0.000           | 0.51              | 0.020         |
| <i>Snord82</i> | 1545                    | high                  | 0.85                | 0.00            | 0.59              | 0.01          |
| <i>Snord47</i> | 4251                    | high                  | 1.01                | 0.00            | 0.14              | 0.27          |
