# Supplementary material for: ZBED6 Modulates the Transcription of Myogenic Genes in Mouse Myoblast Cells
Source: PubMed Central journal article supplement (PMC3979763; doi:10.1371/journal.pone.0094187), 2014-04-08
Supplement: pone.0094187.s009.pdf [file pone.0094187.s009.pdf]

**Table S4.** Gene Ontology analysis of genes with differential expressions identified by RNA-seq.

| GO term                      | Count | PValue  | Fold Enrichment | FDR     |
|------------------------------|-------|---------|-----------------|---------|
| Muscle protein               | 13    | 5.0E-08 | 8.0             | 6.9E-05 |
| Contractile fiber            | 16    | 2.0E-07 | 5.4             | 3.2E-04 |
| Myofibril                    | 15    | 8.0E-07 | 5.2             | 0.0011  |
| Contractile fiber part       | 14    | 3.0E-06 | 5.2             | 0.0034  |
| Cytoskeletal protein binding | 33    | 5.0E-06 | 2.4             | 0.0080  |
| Heart development            | 22    | 1.0E-05 | 3.0             | 0.0250  |
| Muscle contraction           | 12    | 2.0E-05 | 5.6             | 0.0391  |
| Actin cytoskeleton           | 20    | 2.0E-05 | 3.1             | 0.0326  |
| Actin binding                | 25    | 2.0E-05 | 2.7             | 0.0364  |
| Sarcomere                    | 12    | 4.0E-05 | 4.8             | 0.0508  |
