# Supplementary material for: ZBED6 Modulates the Transcription of Myogenic Genes in Mouse Myoblast Cells
Source: PubMed Central journal article supplement (PMC3979763; doi:10.1371/journal.pone.0094187), 2014-04-08
Supplement: pone.0094187.s010.pdf [file pone.0094187.s010.pdf]

**Table S5.** Twenty-six differentially expressed genes with evolutionary conserved ZBED6 binding sites.

| Gene symbol     | RNAseq Day2 M-value | RNAseq Day2 FDR | Palindr-ome | Position                      | Palindrome and motif  |
|-----------------|---------------------|-----------------|-------------|-------------------------------|-----------------------|
| <i>Igf2</i>     | 1.66                | 6.5E-198        | yes         | chr7:149,850,145-149,850,170  | <b>GCCTAGGCTCGC</b>   |
| <i>Ppm1e</i>    | 1.33                | 7.7E-20         | yes         | chr11:87,172,533-87,172,613   | <b>CCGAGCTCGG</b>     |
| <i>Igsf11</i>   | 1.11                | 2.5E-12         | yes         | chr16:38,902,446-38,902,529   | <b>TCCCGGGCTCGC</b>   |
| <i>Epm2a</i>    | 1.05                | 7.3E-05         | yes         | chr10:11,063,199-11,063,281   | <b>GGAGCTCGC</b>      |
| <i>Fgf11</i>    | 0.94                | 8.5E-14         | yes         | chr11:69,614,477-69,614,557   | <b>TCGAGCTCGC</b>     |
| <i>Acvr2a</i>   | 0.93                | 1.2E-30         | yes         | chr2:48,669,216-48,669,293    | <b>CGAGCTCGCTCG</b>   |
| <i>Ankib1</i>   | 0.90                | 1.1E-46         | yes         | chr5:3,802,755-3,802,836      | <b>TGAGCTCGC</b>      |
| <i>Ppm1l</i>    | 0.88                | 3.8E-22         | yes         | chr3:69,121,310-69,121,394    | <b>CGGCCGCTCG</b>     |
| <i>Kbtbd8</i>   | 0.84                | 8.6E-04         | yes         | chr6:95,068,245-95,068,327    | <b>GCCGGCTCG</b>      |
| <i>Ablim3</i>   | 0.83                | 4.6E-04         | yes         | chr18:62,071,395-62,071,471   | <b>AGAGCTCGC</b>      |
| <i>Enho</i>     | 0.83                | 5.4E-20         | yes         | chr4:41,587,326-41,587,406    | <b>GAGCTCG</b>        |
| <i>Larp4</i>    | 0.71                | 5.5E-41         | yes         | chr15:99,803,803-99,803,883   | <b>CACATGTTGCTCGC</b> |
| <i>Tmeff1</i>   | 0.63                | 9.6E-08         | No          | chr4:48,598,746-48,598,833    | <b>GGGTTTGCTCG</b>    |
| <i>G3bp2</i>    | 0.62                | 7.0E-27         | yes         | chr5:92,512,633-92,512,716    | <b>CGAGCTCG</b>       |
| <i>Homer1</i>   | 0.58                | 1.1E-08         | yes         | chr13:94,073,557-94,073,589   | <b>AGAGCTCG</b>       |
| <i>Arc</i>      | -0.60               | 7.9E-06         | no          | chr15:74,503,007-74,503,093   | <b>GGCAGCTCG</b>      |
| <i>Socs3</i>    | -0.62               | 5.1E-21         | no          | chr11:117,829,280-117,829,370 | <b>GCGGGCTCG</b>      |
| <i>Dlx3</i>     | -0.64               | 2.0E-16         | no          | chr11:94,981,609-94,981,698   | <b>TCCAGCTCGC</b>     |
| <i>Slc9a3r1</i> | -0.65               | 9.9E-18         | no          | chr11:115,025,314-115,025,393 | <b>CGCTGCTCG</b>      |
| <i>Nfkbil1</i>  | -0.65               | 3.2E-09         | no          | chr17:35,372,053-35,372,138   | <b>CTGGGCTCGC</b>     |
| <i>Pim3</i>     | -0.74               | 4.9E-46         | no          | chr15:88,693,848-88,693,934   | <b>CTGCCTCG</b>       |
| <i>Ier2</i>     | -0.80               | 3.1E-75         | no          | chr8:87,189,322-87,189,408    | <b>AGGGGCTCGC</b>     |
| <i>Twist2</i>   | -0.80               | 3.8E-09         | no          | chr1:93,697,317-93,697,400    | <b>AGAGGCTCGC</b>     |
| <i>Ddit4</i>    | -0.86               | 4.0E-146        | no          | chr10:59,414,122-59,414,207   | <b>CCAGGCTCGC</b>     |
| <i>Stc2</i>     | -1.00               | 9.8E-92         | no          | chr11:31,269,956-31,270,039   | <b>CGCGGCTCG</b>      |
| <i>Sfrp2</i>    | -1.12               | 1.0E-208        | no          | chr3:83,568,327-83,568,420    | <b>TCTCGCTCGC</b>     |
