# Supplementary material for: ZBED6 Modulates the Transcription of Myogenic Genes in Mouse Myoblast Cells
Source: PubMed Central journal article supplement (PMC3979763; doi:10.1371/journal.pone.0094187), 2014-04-08
Supplement: pone.0094187.s011.pdf [file pone.0094187.s011.pdf]

**Table S6.** Significant GO categories for the top 300 H3K9ac genes.

| Category        | Term                                     | Count | %    | P-Value | Benjamini |
|-----------------|------------------------------------------|-------|------|---------|-----------|
| GOTERM_CC_FAT   | contractile fiber                        | 17    | 5.7  | 2.4E-11 | 2.7E-09   |
| GOTERM_CC_FAT   | myofibril                                | 17    | 5.7  | 1.5E-11 | 3.4E-09   |
| SP_PIR_KEYWORDS | muscle protein                           | 13    | 4.3  | 3.6E-11 | 9.4E-09   |
| GOTERM_CC_FAT   | sarcomere                                | 15    | 5.0  | 5.7E-10 | 4.3E-08   |
| GOTERM_CC_FAT   | contractile fiber part                   | 15    | 5.0  | 1.3E-09 | 7.5E-08   |
| GOTERM_MF_FAT   | calcium ion binding                      | 31    | 10.3 | 5.9E-08 | 2.0E-05   |
| GOTERM_CC_FAT   | I band                                   | 10    | 3.0  | 1.2E-06 | 5.5E-05   |
| SP_PIR_KEYWORDS | calcium                                  | 25    | 8.3  | 1.3E-06 | 1.8E-04   |
| GOTERM_CC_FAT   | actin cytoskeleton                       | 14    | 4.7  | 4.9E-05 | 1.8E-03   |
| GOTERM_CC_FAT   | myosin complex                           | 7     | 2.3  | 2.6E-04 | 8.4E-03   |
| GOTERM_CC_FAT   | Z disc                                   | 7     | 2.3  | 3.6E-04 | 1.0E-02   |
| KEGG_PATHWAY    | Cardiac muscle contraction               | 8     | 2.7  | 1.3E-04 | 1.3E-02   |
| KEGG_PATHWAY    | Hypertrophic cardiomyopathy (HCM)        | 8     | 2.7  | 2.9E-04 | 1.4E-02   |
| GOTERM_CC_FAT   | myosin filament                          | 4     | 1.3  | 1.2E-03 | 3.0E-02   |
| GOTERM_BP_FAT   | muscle organ development                 | 13    | 4.3  | 3.3E-05 | 3.7E-02   |
| INTERPRO        | Immunoglobulin subtype 2                 | 9     | 3.0  | 5.6E-04 | 4.5E-02   |
| GOTERM_CC_FAT   | integral to plasma membrane              | 12    | 4.0  | 2.3E-03 | 5.0E-02   |
| INTERPRO        | Immunoglobulin I-set                     | 8     | 2.7  | 5.2E-04 | 5.1E-02   |
| SP_PIR_KEYWORDS | glycoprotein                             | 54    | 18.0 | 6.2E-04 | 5.3E-02   |
| SMART           | IGc2                                     | 9     | 3.0  | 9.0E-04 | 5.5E-02   |
| INTERPRO        | Calcium-binding EF-hand                  | 9     | 3.0  | 4.6E-04 | 5.6E-02   |
| INTERPRO        | EF-HAND 2                                | 11    | 3.7  | 2.5E-04 | 6.0E-02   |
| KEGG_PATHWAY    | Dilated cardiomyopathy                   | 7     | 2.3  | 1.8E-03 | 6.0E-02   |
| INTERPRO        | EF-HAND 1                                | 11    | 3.7  | 4.0E-04 | 6.4E-02   |
| GOTERM_CC_FAT   | intrinsic to plasma membrane             | 12    | 4.0  | 3.5E-03 | 6.9E-02   |
| INTERPRO        | EF-Hand type                             | 12    | 4.0  | 1.5E-04 | 7.3E-02   |
| SP_PIR_KEYWORDS | skeletal muscle                          | 4     | 1.3  | 1.2E-03 | 7.5E-02   |
| GOTERM_BP_FAT   | muscle contraction                       | 7     | 2.3  | 3.0E-04 | 8.2E-02   |
| INTERPRO        | EGF-like calcium-binding. conserved site | 7     | 2.3  | 1.6E-03 | 8.7E-02   |
| SMART           | EGF_CA                                   | 7     | 2.3  | 2.2E-03 | 8.7E-02   |
| INTERPRO        | EGF-like calcium-binding                 | 7     | 2.3  | 1.5E-03 | 8.8E-02   |

---

|                       |                                                                     |    |     |         |         |
|-----------------------|---------------------------------------------------------------------|----|-----|---------|---------|
| <b>SMART</b>          | EFh                                                                 | 9  | 3.0 | 7.5E-04 | 8.9E-02 |
| <b>INTERPRO</b>       | EGF-type<br>aspartate/asparagine<br>hydroxylation<br>conserved site | 7  | 2.3 | 1.3E-03 | 9.0E-02 |
| <b>UP_SEQ_FEATURE</b> | domain:EF-hand 1                                                    | 10 | 3.3 | 2.3E-04 | 9.3E-02 |

---
