# Supplementary material for: ZBED6 Modulates the Transcription of Myogenic Genes in Mouse Myoblast Cells
Source: PubMed Central journal article supplement (PMC3979763; doi:10.1371/journal.pone.0094187), 2014-04-08
Supplement: pone.0094187.s012.pdf [file pone.0094187.s012.pdf]

**Table S7.** Primer and probe sets for qPCR validation.

| Gene           | Primer/probe | Primer sequences (5'→3')  |
|----------------|--------------|---------------------------|
| <i>Zbed6</i>   | forward      | CAAGACATCTGCAGTTTGGAATTT  |
|                | reverse      | TGTCGTTGAAGTGTTGAAGTTCCTA |
|                | probe        | ACATCTCAAGAGCTGTGTGT      |
| <i>Igf2</i>    | forward      | CGTGGCATCGTGGAAGAGT       |
|                | reverse      | ACACGTCCCTCTCGGACTTG      |
|                | probe        | CTGGCCCTCCTGGAG           |
| <i>18s</i>     | forward      | AGTCCCTGCCCTTTGTACACA     |
|                | reverse      | GATCCGAGGGCCTCACTAAAC     |
|                | probe        | CGCCCGTCGCTACTACCGATTGG   |
| <i>Myog</i>    | forward      | GGCTGCCTAAAGTGGAGATCCT    |
|                | reverse      | AGGCCTGTAGG CGCTCAAT      |
|                | probe        | CAGCGCCATCCAGT            |
| <i>Actb</i>    | forward      | ATATCGCTGGGCTGGTCGTC      |
|                | reverse      | AGGATGGCGTGAGGGAGAGC      |
| <i>H19</i>     | forward      | AAGCTATCTCCGGGACTCCAA     |
|                | reverse      | TTACCCCTTTTGAATTTGCA      |
| <i>Sfrp2</i>   | forward      | ACGACAACGACATCATGGAA      |
|                | reverse      | ACGCCGTTGAGCTTGTAAT       |
| <i>Ddit4</i>   | forward      | GGTCTGCAGCCAGAGAAGAG      |
|                | reverse      | GACACCCCATCCAGGTATGA      |
| <i>Nfkb1l</i>  | forward      | ATGCCACCGGACCTGTTG        |
|                | reverse      | GCCCCCTCTGGAGGAA          |
| <i>Snord47</i> | forward      | CCAGTGATGTGATGATTCTGC     |
|                | reverse      | AAATGGAACGGTTTAAAGGTG     |
| <i>Snord57</i> | forward      | GGAAAGGATGAACGAACTTGG     |
|                | reverse      | CAGTTGTATTGCCTCCATTTCTG   |
| <i>Snord82</i> | forward      | ATTTCAACCCCATGGTTCAG      |
|                | reverse      | CACAAGTGATGAGTGACAAAGG    |
| <i>Snord95</i> | forward      | GATGACCACAACATGCCATC      |
|                | reverse      | AACAGCCTCTGGATTTGAGC      |
| <i>Snord12</i> | forward      | TTCTTTCCCGTCAGATCG        |
|                | reverse      | CATCAGACAAAACCTGGCAATTAG  |
| <i>Nr4a1</i>   | forward      | AGCACTGCCAAATTGGACTA      |
|                | reverse      | TCTGCCCACTTTTCGGATAAC     |
| <i>Myo5a</i>   | forward      | ATGCCTACAGTGGCCAGAAC      |
|                | reverse      | GCGCCTGACTCTCCACTTAC      |
| <i>Fgf11</i>   | forward      | CAGGAGCTTGGGCACAAAG       |
|                | reverse      | CATGAAGGGAAACCGAGTCAA     |
| <i>Prrx2</i>   | forward      | AACCGCCGTGCCAAGTT         |
|                | reverse      | CAGAGCGGGTAGCCAGCAT       |
| <i>Mef2a</i>   | forward      | ACATGAACCAGGAAGCCTTAGG    |
|                | reverse      | GCCCTTCTGTAAAACGCATGA     |
| <i>Elk4</i>    | forward      | TCCGTCATCAAATTTGTGACAAC   |
|                | reverse      | AGCAGCGACAGGCTCGAT        |
| <i>Sp1</i>     | forward      | GGCTACCCCTACCTCAAAGGA     |
|                | reverse      | TTGGAAGACTCGCTGCCATT      |
| <i>Nfkb1</i>   | forward      | AGCAGGATGCTGAGGATTCTG     |

reverse

GGCAACTCTGTCCTGCACCTA

---
